# Supplementary material for: Ecological Risk Assessment and Source Contributions of Heavy Metals in the Sediment of the Chan Thnal Reservoir, Kampong Speu, Cambodia
Source: MDPI journal article supplement (doi:10.3390/w15081566), 2023-04-17
Supplement: s1 [file s1]

Archive with 1 entries (1 files):
- water-2241559-supplementary.pdf
