# Supplementary material for: Ecological Risk Assessment and Source Contributions of Heavy Metals in the Sediment of the Chan Thnal Reservoir, Kampong Speu, Cambodia
Source: MDPI journal article supplement (doi:10.3390/w15081566), 2023-04-17
Supplement: s1 [file s1 › water-2241559-supplementary.pdf]

# Ecological Risk Assessment and Source Contributions of Heavy Metals in the Sediment of the Chan Thnal Reservoir, Kampong Speu, Cambodia

Lita Chheang <sup>1</sup>, Pichet Limsuwan <sup>2</sup>, Nisakorn Thongkon <sup>1</sup>, Tongchai Sriwiriyarat <sup>3</sup> and Suddida Pliankarom <sup>4\*</sup>

<sup>1</sup> Department of Chemistry, Faculty of Science, King Mongkut's University of Technology Thonburi, Bangkok 10140, Thailand; lita.chheang@mail.kmutt.ac.th (L.C.); nisakorn.tho@kmutt.ac.th (N.T.)

<sup>2</sup> Department of Physics, Faculty of Science, King Mongkut's University of Technology Thonburi, Bangkok 10140, Thailand; pichet.lim@kmutt.ac.th

<sup>3</sup> Department of Chemical Engineering, Faculty of Engineering, Burapha University, Chonburi 20131, Thailand; sriwiri@buu.ac.th

<sup>4</sup> Chemistry for Green Society and Healthy Living Research Unit, Faculty of Science, King Mongkut's University of Technology Thonburi, Bangkok 10140, Thailand

\*Correspondence: suddida.tha@mail.kmutt.ac.th; Tel.: +66-24-709-560

## Supplementary Data

**Table S1.** Heavy metal concentrations in the water of the Chan Thnal reservoir and the acceptable levels

| Locations             | Mean Concentrations (µg/L) in Water Samples |                      |                      |                       |                     |                       |                     |                     |                     |
|-----------------------|---------------------------------------------|----------------------|----------------------|-----------------------|---------------------|-----------------------|---------------------|---------------------|---------------------|
|                       | Cd                                          | Cu                   | Zn                   | Pb                    | As                  | Cr                    | Mn                  | Co                  | Fe                  |
| L1                    | 0.72 <sup>a</sup>                           | 10.11 <sup>a,b</sup> | 72.63 <sup>b</sup>   | 15.60 <sup>a,b</sup>  | 6.26 <sup>b</sup>   | 7.90 <sup>a</sup>     | 0.28 <sup>b,c</sup> | 5.57 <sup>a,b</sup> | 661.90 <sup>a</sup> |
| L2                    | 0.72 <sup>a</sup>                           | 3.58 <sup>c</sup>    | 98.92 <sup>a</sup>   | 12.69 <sup>c</sup>    | 7.18 <sup>a,b</sup> | 6.07 <sup>c</sup>     | 0.30 <sup>b</sup>   | 5.41 <sup>c</sup>   | 495.20 <sup>b</sup> |
| L3                    | 0.83                                        | 4.98 <sup>c</sup>    | 43.57 <sup>c</sup>   | 16.19 <sup>a</sup>    | 7.10 <sup>a,b</sup> | 6.19 <sup>b,c</sup>   | 0.29 <sup>b,c</sup> | 5.45 <sup>b,c</sup> | 351.50 <sup>c</sup> |
| L4                    | 0.77 <sup>a</sup>                           | 9.93 <sup>a,b</sup>  | 60.08 <sup>b</sup>   | 16.96 <sup>a</sup>    | 4.72 <sup>c</sup>   | 6.92 <sup>a,b,c</sup> | 0.18 <sup>d</sup>   | 5.45 <sup>b,c</sup> | 199.71 <sup>d</sup> |
| L5                    | 0.83 <sup>a</sup>                           | 8.30 <sup>b</sup>    | 58.69 <sup>b,c</sup> | 14.136 <sup>b,c</sup> | 6.84 <sup>a,b</sup> | 7.37 <sup>a,b</sup>   | 0.40 <sup>a</sup>   | 5.63 <sup>a</sup>   | 508.10 <sup>b</sup> |
| L6                    | 0.80 <sup>a</sup>                           | 10.92 <sup>a</sup>   | 110.24 <sup>a</sup>  | 15.44 <sup>a,b</sup>  | 7.63 <sup>a</sup>   | 7.56 <sup>a</sup>     | 0.23 <sup>c,d</sup> | 5.60 <sup>a</sup>   | 610.80 <sup>a</sup> |
| Average ± SD          | 0.78 ± 0.06                                 | 8.0 ± 0.839          | 74.02 ± 7.163        | 15.17 ± 0.922         | 6.620 ± 0.432       | 7.00 ± 0.651          | 0.28 ± 0.025        | 5.52 ± 0.063        | 471.20 ± 46.640     |
| WHO 2017 <sup>1</sup> | 3                                           | 2000                 | 1000                 | 10                    | 10                  | 50                    | 100                 | 4                   | 300                 |

<sup>1</sup> refers to the World Health Organization regulatory limits for water [1]

Data are presented as the mean values; SD means standard deviation, ND means not detected. Values with similar letters refer to “not significantly different”, where a, b, c, d, e, f refer to “significantly different” ( $p < 0.05$ ) with the following order:  $a < b < c < d < e < f$  (Minitab 16 ANOVA one-way test).

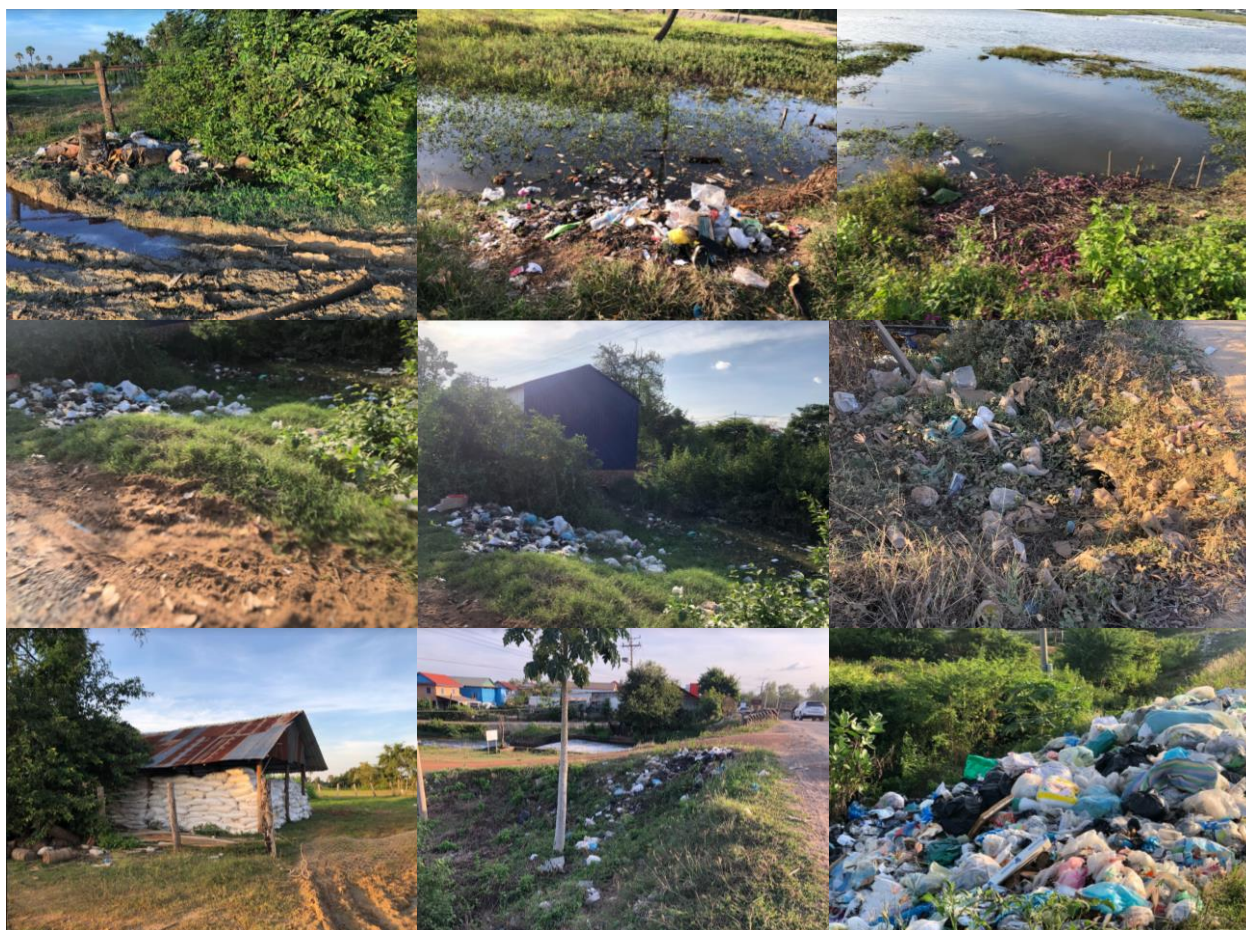

**Figure S1.** Open dumping and outdoor chemical storage in the study area.

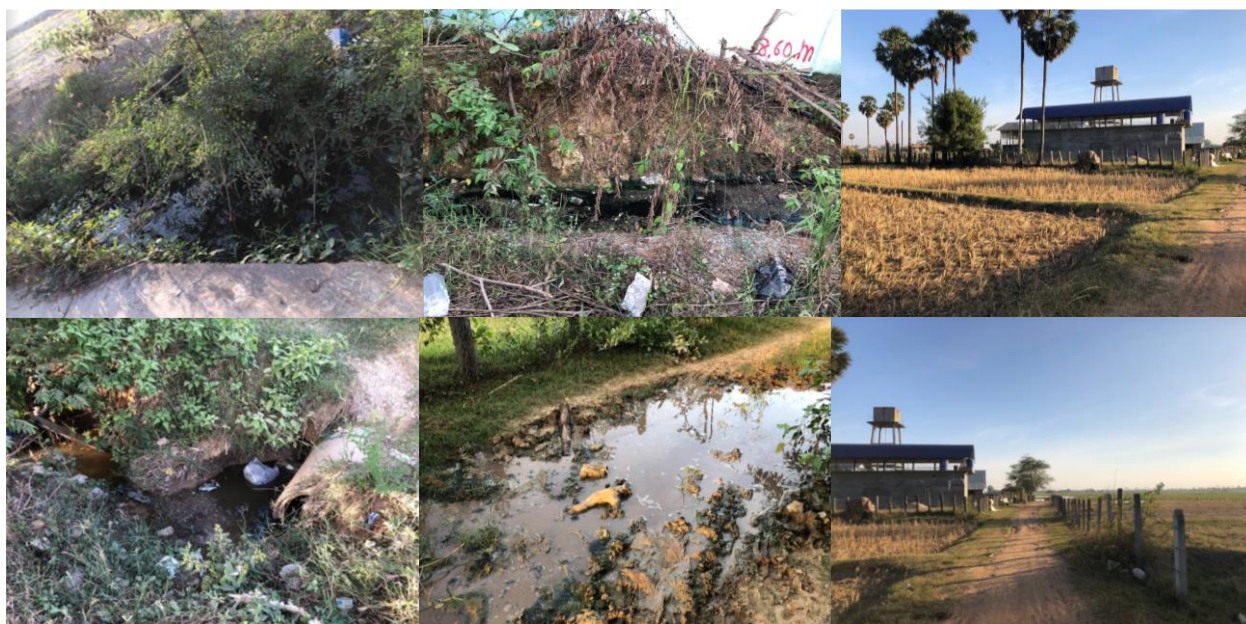

**Figure S2.** Direct discharge from municipal area and poultry farm in the study area.

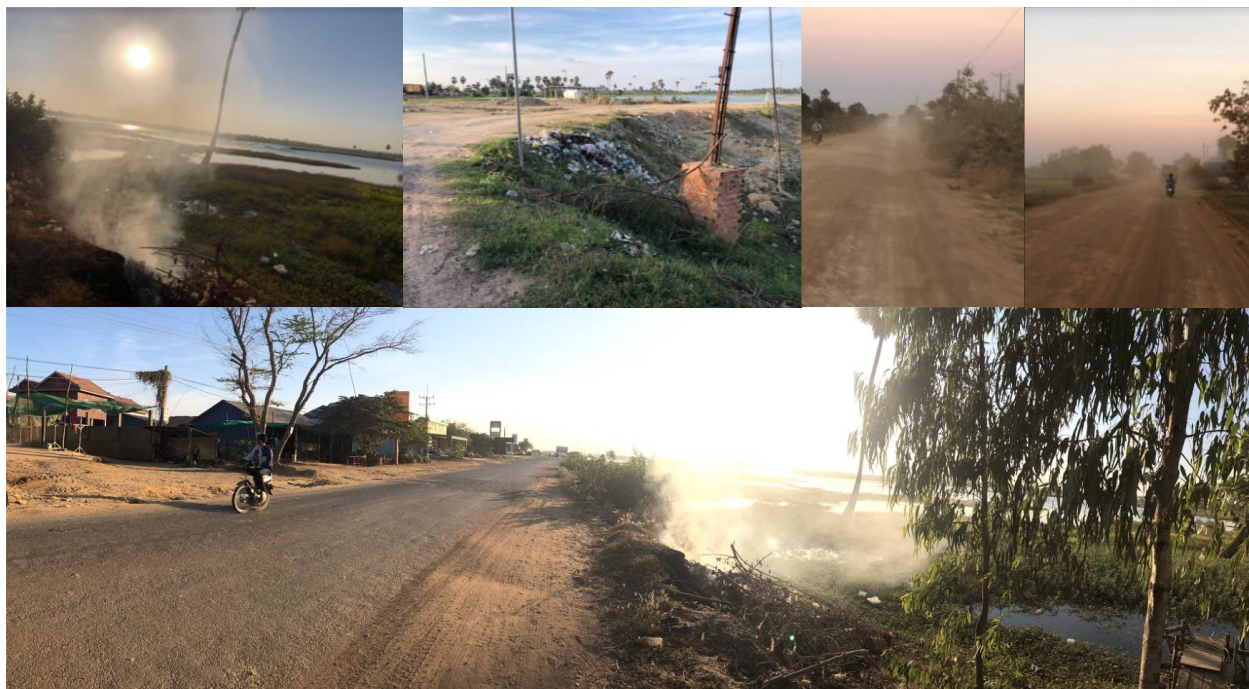

**Figure S3.** Road dust, vehicle exhaust and open burning in the study area.
